# Supplementary material for: Design of single-atom catalysts for NO oxidation using OH radicals
Source: Royal Society of Chemistry journal article supplement (doi:10.1039/d3ta05199d), 2023-01-01
Supplement: d3ta05199d1.pdf [file d3ta05199d1.pdf]

## Supporting Information

1

### 2 **Design of Single-Atom Catalyst for NO Oxidation Using OH Radical**

3 Weijie Yang<sup>abc\*</sup>, Liugang Chen<sup>abc</sup>, Zhenhe Jia<sup>abc</sup>, Binghui Zhou<sup>abc</sup>, Yanfeng Liu<sup>abc</sup>, Chongchong Wu<sup>d</sup>, and  
4 Zhengyang Gao<sup>abc\*</sup>

5 <sup>a</sup> Department of Power Engineering, North China Electric Power University, Baoding 071003, Hebei, China

6 <sup>b</sup> Hebei Key Laboratory of Low Carbon and High-Efficiency Power Generation Technology, North China  
7 Electric Power University, Baoding 071003, Hebei, China

8 <sup>c</sup> Baoding Key Laboratory of Low Carbon and High-Efficiency Power Generation Technology, North China  
9 Electric Power University, Baoding 071003, Hebei, China

10 <sup>d</sup> CNOOC Research Institute of Refining and Petrochemicals, Beijing 102200, PR China

11 \* **Corresponding author:**

12 Weijie Yang([yangwj@ncepu.edu.cn](mailto:yangwj@ncepu.edu.cn)); Zhengyang Gao ([gaozhyan@163.com](mailto:gaozhyan@163.com)).

13

## 14 Computation and Modeling Methods

15 In this work, we employed a microkinetic framework based on Sabatier analysis<sup>1</sup> to find the upper limit of the  
16 overall reaction rate for NO oxidation. The *Sabatier* rate is the reaction rate assumed to be optimal for each  
17 basic reaction, which can well reflect the catalytic reaction ability of the surface. This process is similar to the  
18 previously reported oxidation reaction model.<sup>2, 3</sup> According to the discussion in the main text, the NO  
19 oxidation reaction can be divided into the following three basic steps:

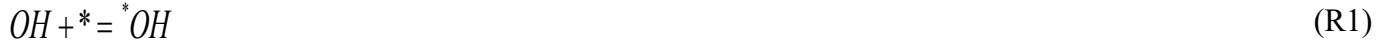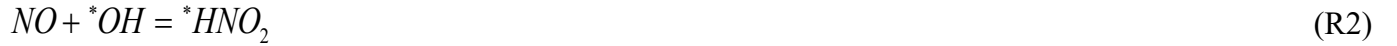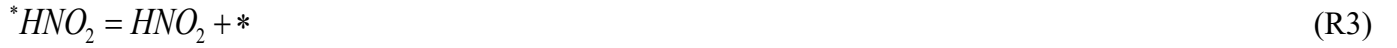

20 It is assumed that R1 is in an equilibrium state. The forward rate constants of other steps are given by:

$$k_i = \nu_i \exp\left[\frac{-\Delta G_{ai}}{kT}\right] = \nu_i \exp\left[\frac{-(E_{ai} - T\Delta S_{ai})}{kT}\right] \quad (1)$$

21 where  $\nu_i$  is the prefactor,  $E_{ai}$  is the activation energy, and  $\Delta S_{ai}$  is the entropy difference between the  
22 transition state and the initial state,  $k$  is the Boltzmann constant, and  $T$  is the temperature.  $\nu_i$  is estimated  
23 by  $KT/h$ , where  $h$  is the Planck's constant.

24 Assuming R1 is in equilibrium, this gives:

$$\theta_{H_2O_2} = \frac{1}{1 + K_1 p(H_2O_2)} \quad (2)$$

25 where  $K_i$  is the equilibrium constant of R1,  $p(H_2O_2)$  is the partial pressure of  $H_2O_2$ .  $K_i$  was calculated by:

$$K_1 = \text{Exp}\left[\frac{-G_1}{kT}\right] \quad (3)$$

26 where  $G_1$  is the free energy of R1. The *Sabatier* rate ( $r_i^{S_{\max}} = \theta_i k_i$ ) of the overall reaction ( $r_s$ ) was

27 estimated by the minimum reaction rate among R2-R3 as a function of OH adsorption energy:

$$r_s = \text{Min}[r_2^{S_{\max}}, r_3^{S_{\max}}] \quad (4)$$

28 Finally, the volcano activity plot was plotted as:

$$A = kTLn[r_s h / kT] \quad (5)$$

29 The following equation can be used to calculate binding energy ( $E_{\text{bind}}$ ).

$$E_{\text{bind}} = E_{\text{sur}} - E_{\text{sub}} - E_M \quad (6)$$

where  $E_{\text{sur}}$ ,  $E_{\text{sub}}$ , and  $E_M$  are the electronic energies of the catalyst, graphene substrate, and single metal atom, respectively.

Adsorption energies ( $E_{\text{ads}}$ ) were computed based on the following equation to examine how strongly gas molecules adhere to catalyst surfaces:

$$E_{\text{ads}} = E_{\text{absorb}} - E_{\text{sur}} - E_{\text{gas}} \quad (7)$$

30 where  $E_{\text{absorb}}$ ,  $E_{\text{sur}}$ , and  $E_{\text{gas}}$  represent the total energies of adsorption systems, catalyst surface, and gases,

31 respectively.

32 The reaction energy barrier ( $E_b$ ) and reaction heat ( $\Delta E$ ) in the reaction pathways were computed based on:

$$E_b = G_{\text{TS}} - G_{\text{IS}} \quad (8)$$

$$\Delta E = G_{FS} - G_{IS} \quad (9)$$

33 where  $G_{IS}$ ,  $G_{TS}$ , and  $G_{FS}$  are the Gibbs free energy energies of the initial, transition, and final states,  
 34 respectively.

35 The Gibbs free energies were obtained using the following equation:

$$G(T, P) = E_{ele} + ZPE + \Delta H - TS(T, P) + K_B T \ln \frac{P}{P^0} \quad (10)$$

36 where  $E_{ele}$  is the system energy in the ground state; ZPE is the zero-correction energy;  $\Delta H$  is the enthalpy  
 37 variation from 0 K to a given temperature; T is the temperature and  $TS(T, P)$  is the entropy of the system  
 38 acquired from vibrational frequency analyses; KB is the Boltzmann constant,  $8.6173303 \times 10^{-5} \text{ eV} \cdot \text{K}^{-1}$ ;  $P^0$  is  
 39 the standing pressure.

40 The system electronegativity ( $X$ ) gives a good description of the interaction of charged metal atoms in different  
 41 coordination environments. In this study, the value of  $X$  was calculated using the following equation:

$$X = (xX_C + yX_N - X_M) \frac{\theta_d}{n_d} \quad (11)$$

42 where x is the number of C atoms adjacent to the metal atom,  $X_C$  is the electronegativity of the C atom, y is  
 43 the number of N atoms adjacent to the metal atom,  $X_N$  is the electronegativity of the N atom,  $X_M$  is the  
 44 electronegativity of the metal atom,  $\theta_d$  is the number of occupied electrons in the d orbital, and  $n_d$  is the  
 45 maximum number of electrons in the d orbital.

## 46 References

47 1. T. Bligaard, J. K. Nørskov, S. Dahl, J. Matthiesen, C. H. Christensen and J. Sehested, *Journal of*

- 48      *Catalysis*, 2004, **224**, 206-217.
- 49 2.    H. Li, A. Cao and J. K. Nørskov, *ACS Catalysis*, 2021, **11**, 12052-12057.
- 50 3.    H. Falsig, B. Hvolbæk, I. S. Kristensen, T. Jiang, T. Bligaard, C. H. Christensen and J. K. Nørskov,
- 51      *Angewandte Chemie International Edition*, 2008, **47**, 4835-4839.
- 52

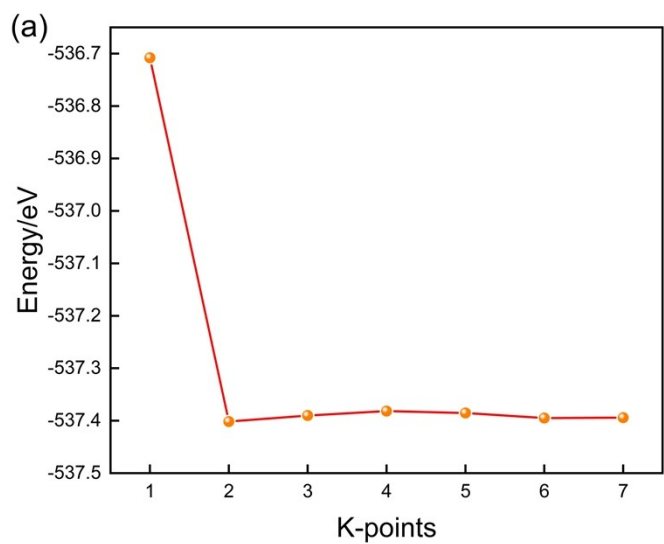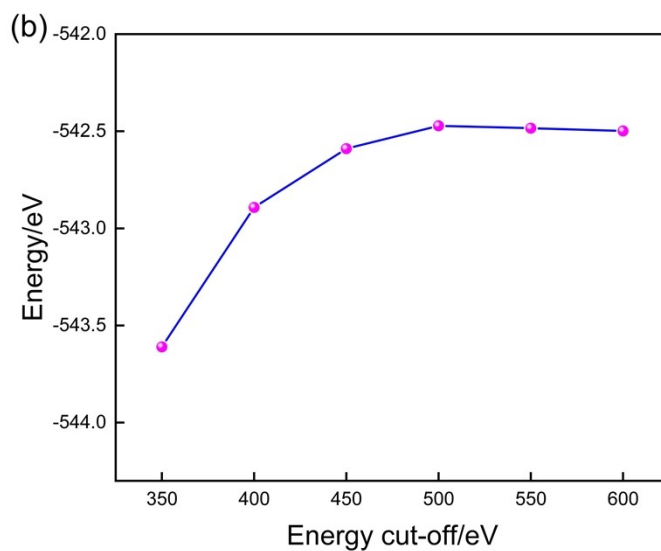

53

54 **Fig. S1** Parameter tests on the settings of (a)  $k$ -points and (b) energy cutoff.

55

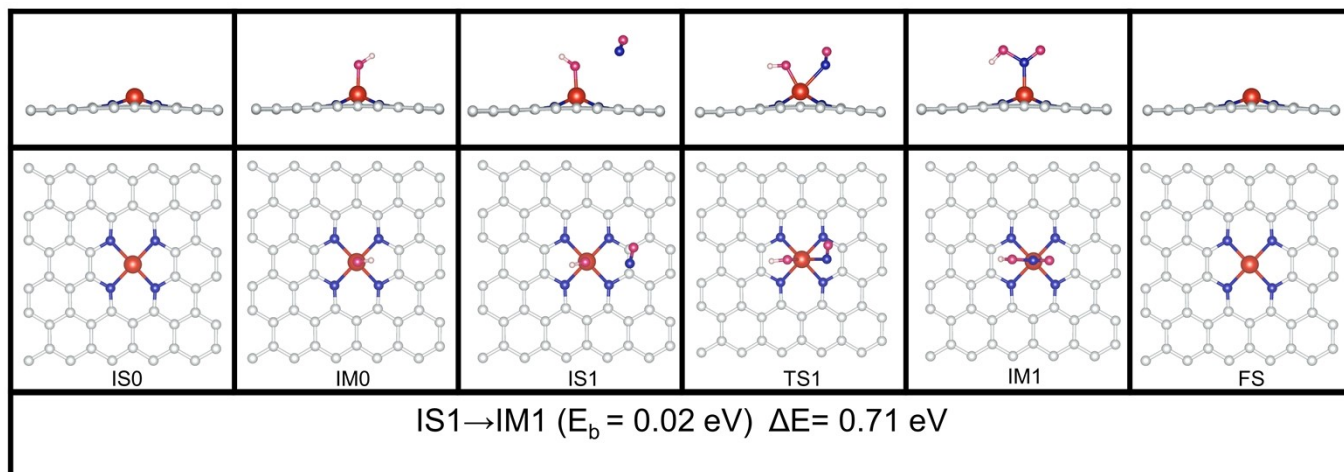

56

57 **Fig. S2** Reaction pathway of catalytic oxidation of NO at V-N<sub>4</sub>-C. C, N, and V are denoted by gray, blue, and

58 red, respectively.

59

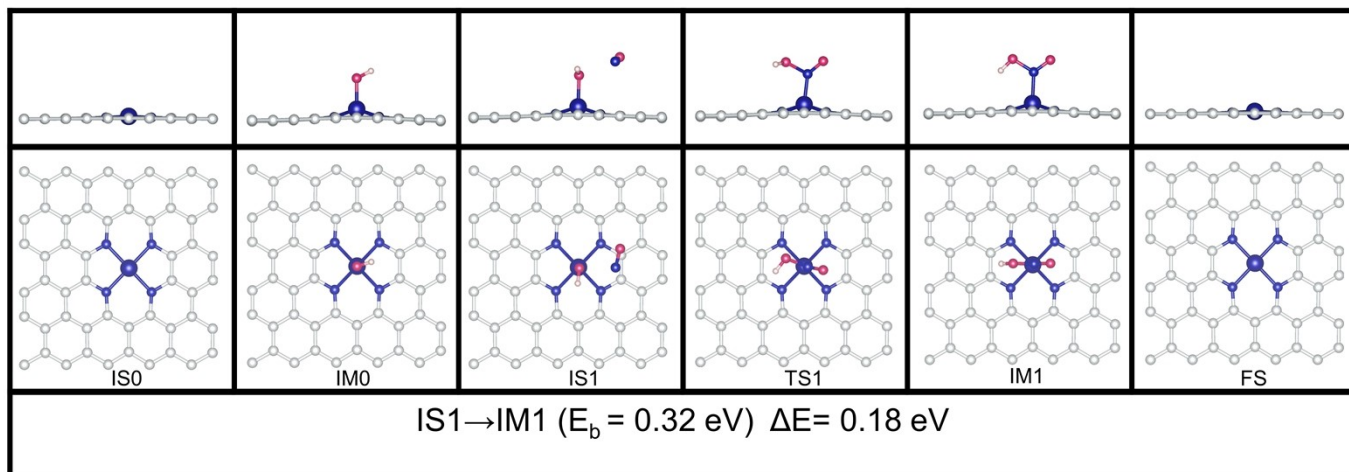

60

61 **Fig. S3** Reaction pathway of catalytic oxidation of NO at Cr-N<sub>4</sub>-C. C, N, and Cr are denoted by gray, blue,  
 62 and dark blue, respectively.

63



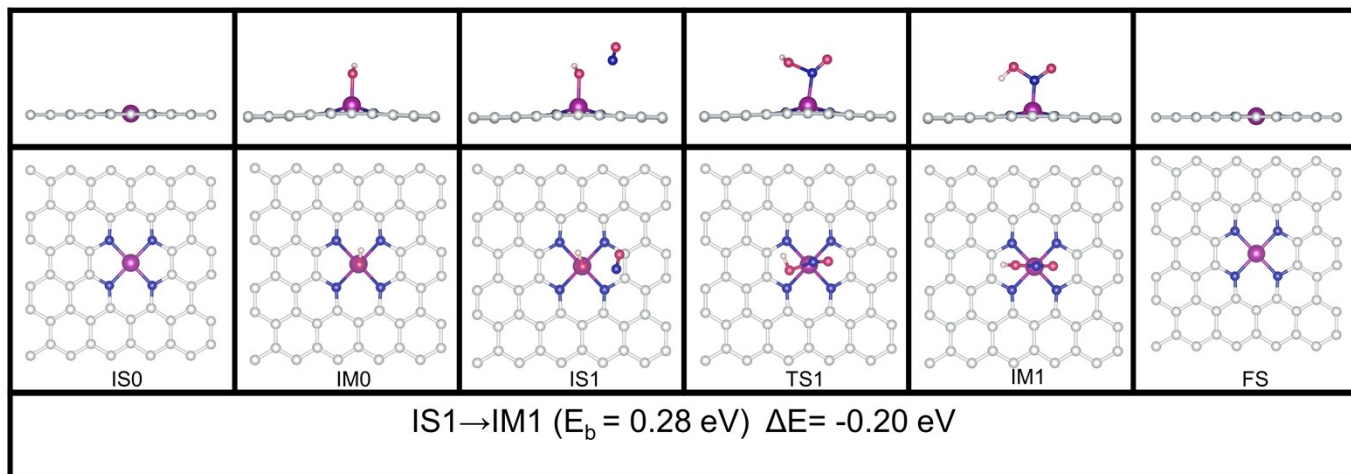

64

65 **Fig. S4** Reaction pathway of catalytic oxidation of NO at Mn-N<sub>4</sub>-C. C, N, and Mn are denoted by gray, blue,

66 and purple, respectively.

67

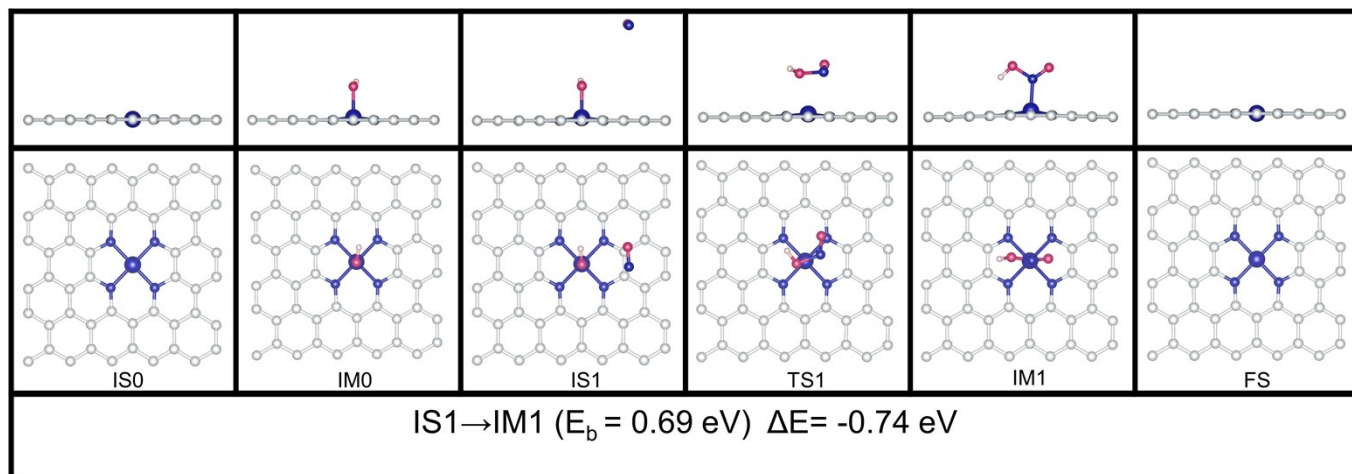

68

69 **Fig. S5** Reaction pathway of catalytic oxidation of NO at Co-N<sub>4</sub>-C. C, N, and Co are denoted by gray, blue,

70 and light blue, respectively.

71

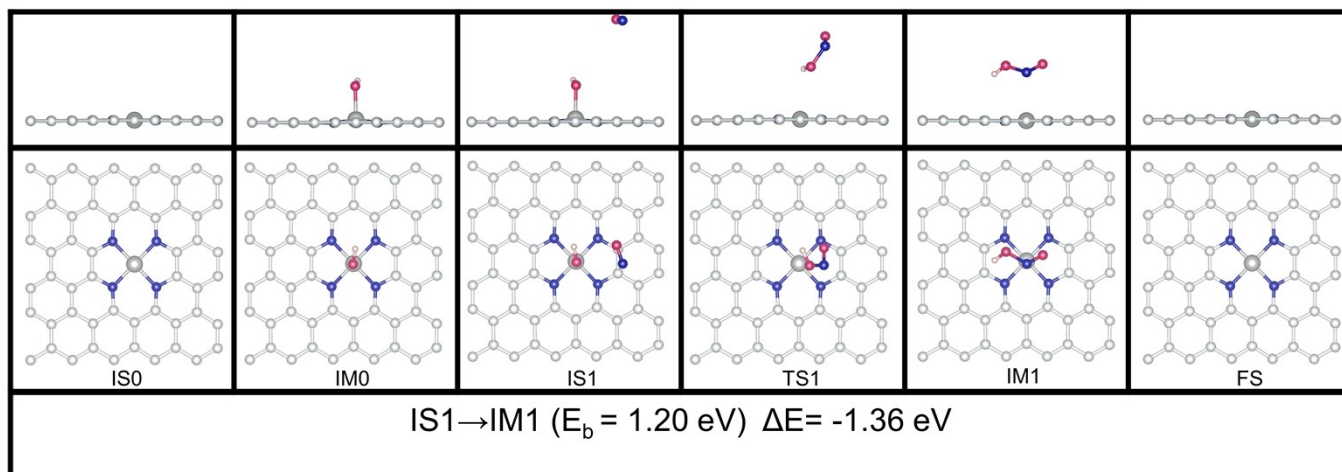

72

73 **Fig. S6** Reaction pathway of catalytic oxidation of NO at Ni-N<sub>4</sub>-C. C, N, and Ni are denoted by gray, blue,

74 and light gray, respectively.

75

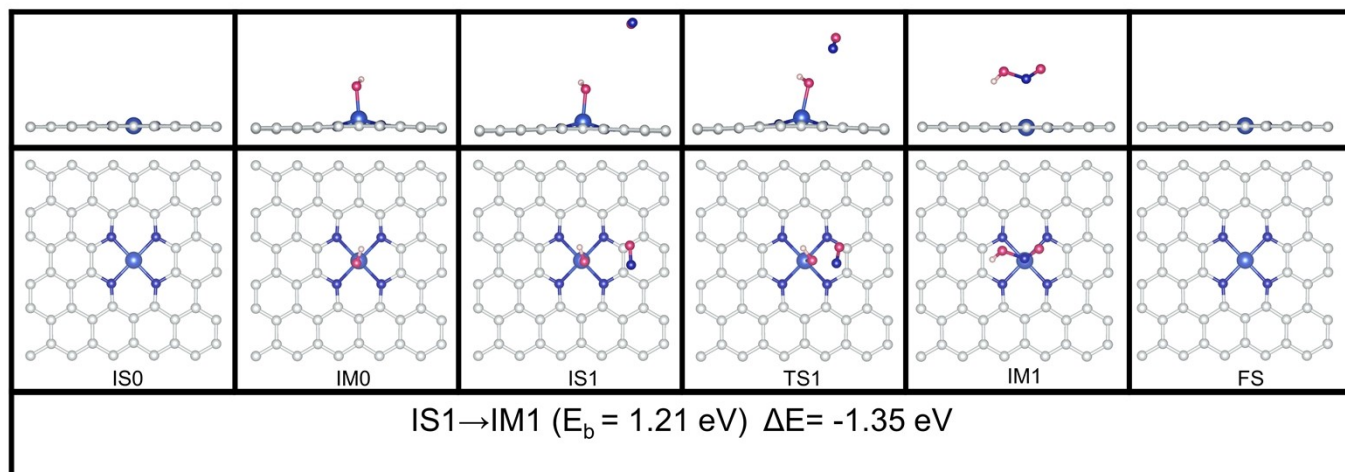

76

77 **Fig. S7** Reaction pathway of catalytic oxidation of NO at Cu-N<sub>4</sub>-C. C, N, and Cu are denoted by gray, blue,

78 and light blue, respectively.

79

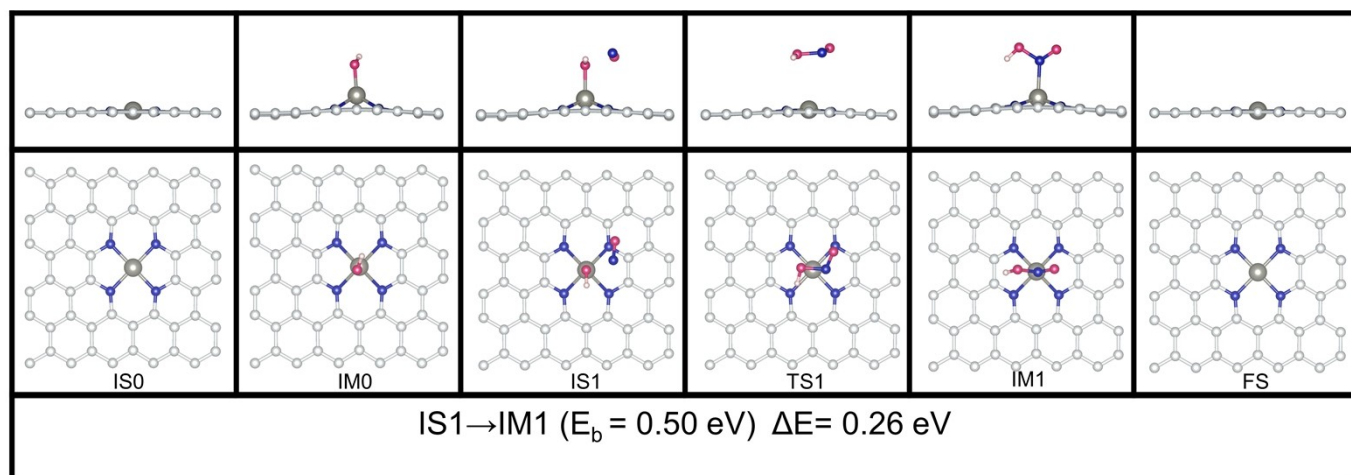

80

81 **Fig. S8** Reaction pathway of catalytic oxidation of NO at Zn-N<sub>4</sub>-C. C, N, and Zn are denoted by gray, blue,

82 and dark gray, respectively.

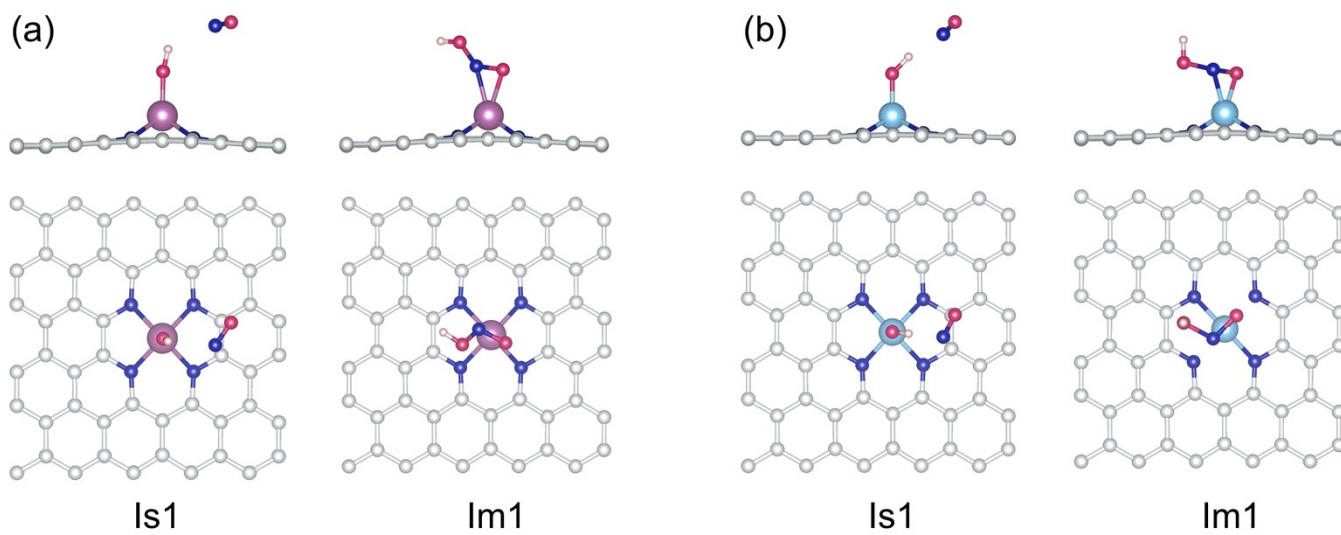

84

85 **Fig. S9** The initial state IS1 and intermediate state IM1 of NO oxidation using OH radical. (a) Sc-N<sub>4</sub>-C

86 catalyst, (b) Ti-N<sub>4</sub>-C catalyst.

88 **Table S1.** Imaginary frequency statistics of different transition state reaction processes in the catalytic of NO  
89 oxidation using OH radical.

| Oxidant              | Reaction pathway | Imaginary frequency(cm <sup>-1</sup> ) |
|----------------------|------------------|----------------------------------------|
| V-N <sub>4</sub> -C  | TS1              | 524.66                                 |
| Cr-N <sub>4</sub> -C | TS1              | 202.98                                 |
| Mn-N <sub>4</sub> -C | TS1              | 368.72                                 |
| Fe-N <sub>4</sub> -C | TS1              | 151.46                                 |
| Co-N <sub>4</sub> -C | TS1              | 153.42                                 |
| Ni-N <sub>4</sub> -C | TS1              | 148.80                                 |
| Cu-N <sub>4</sub> -C | TS1              | 127.85                                 |
| Zn-N <sub>4</sub> -C | TS1              | 193.81                                 |

90

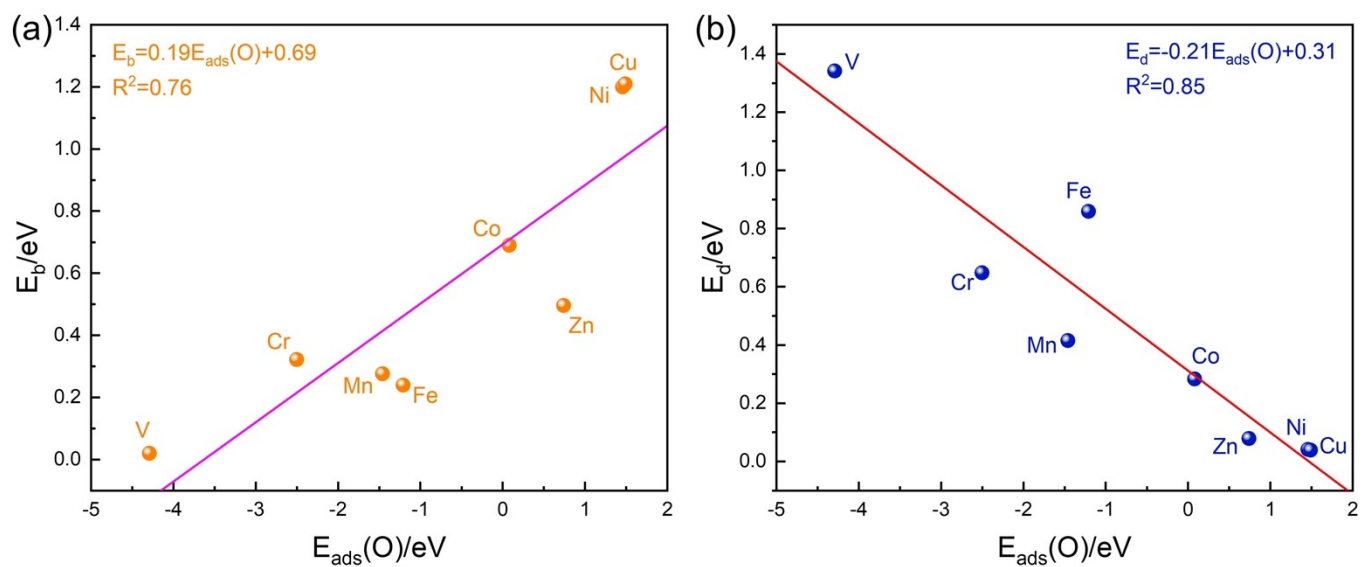

91

92 **Fig. S10** Correlations analyses of (a)  $E_{\text{b}}$  vs  $E_{\text{ads}}(\text{O})$ , (b)  $E_{\text{d}}$  vs  $E_{\text{ads}}(\text{O})$ .

93



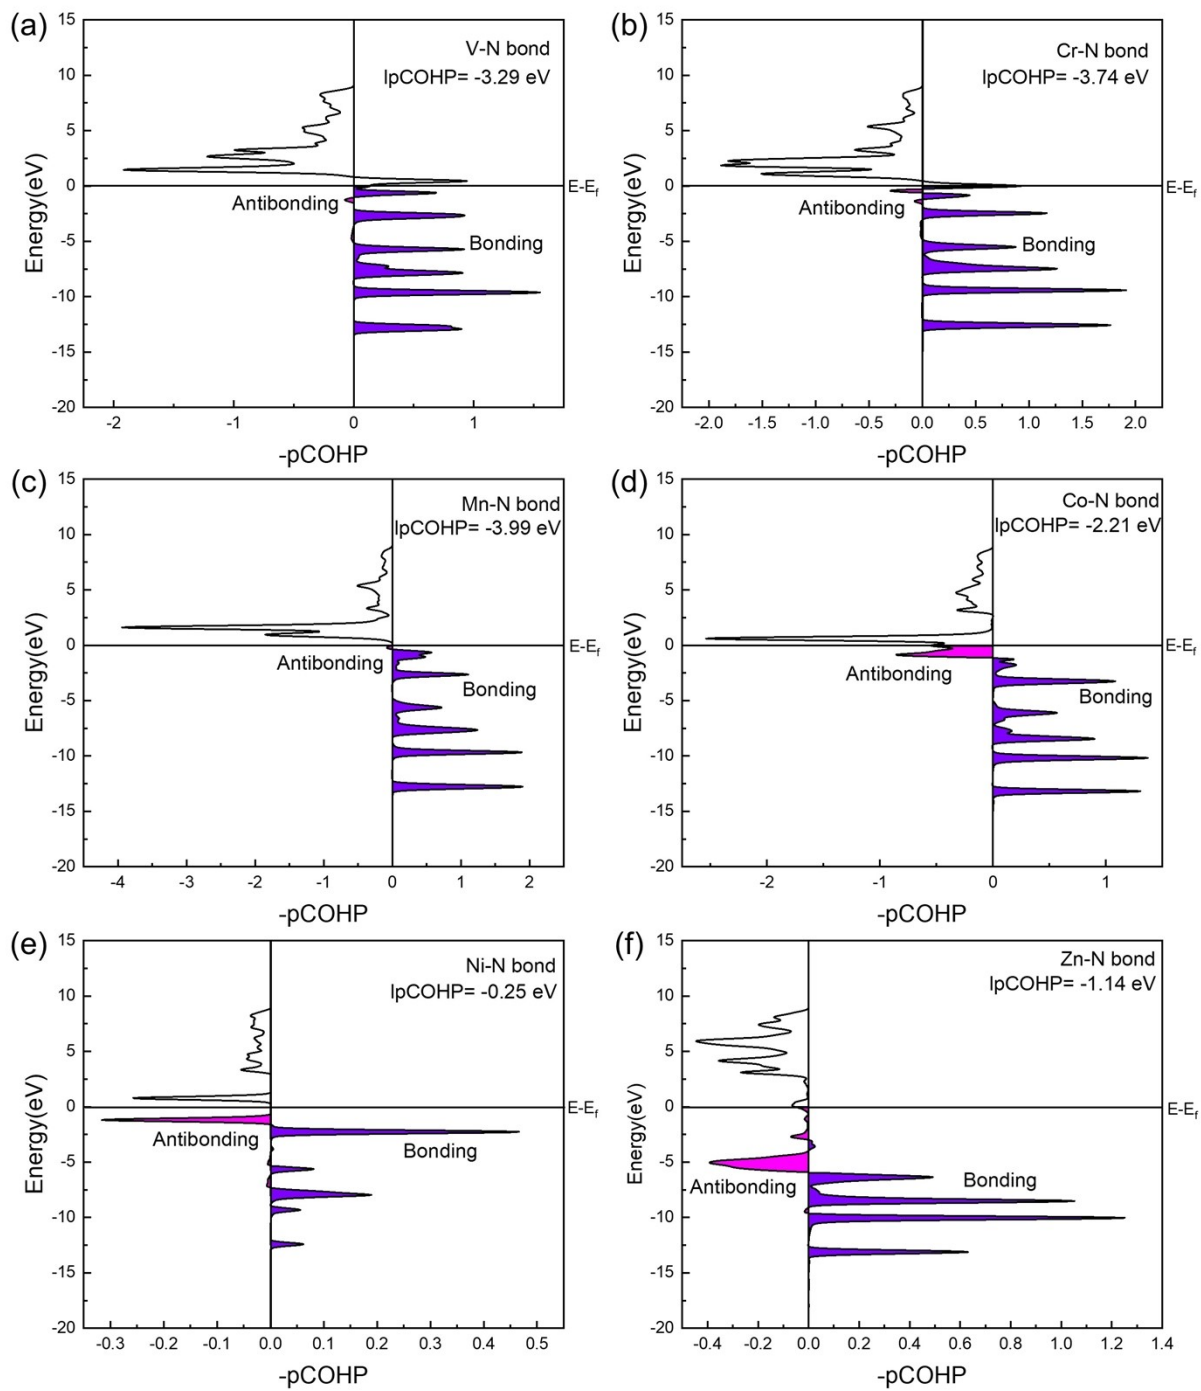

94

95 **Fig. S11** COHP analysis between different SACs and  $\text{HNO}_2$ .

96

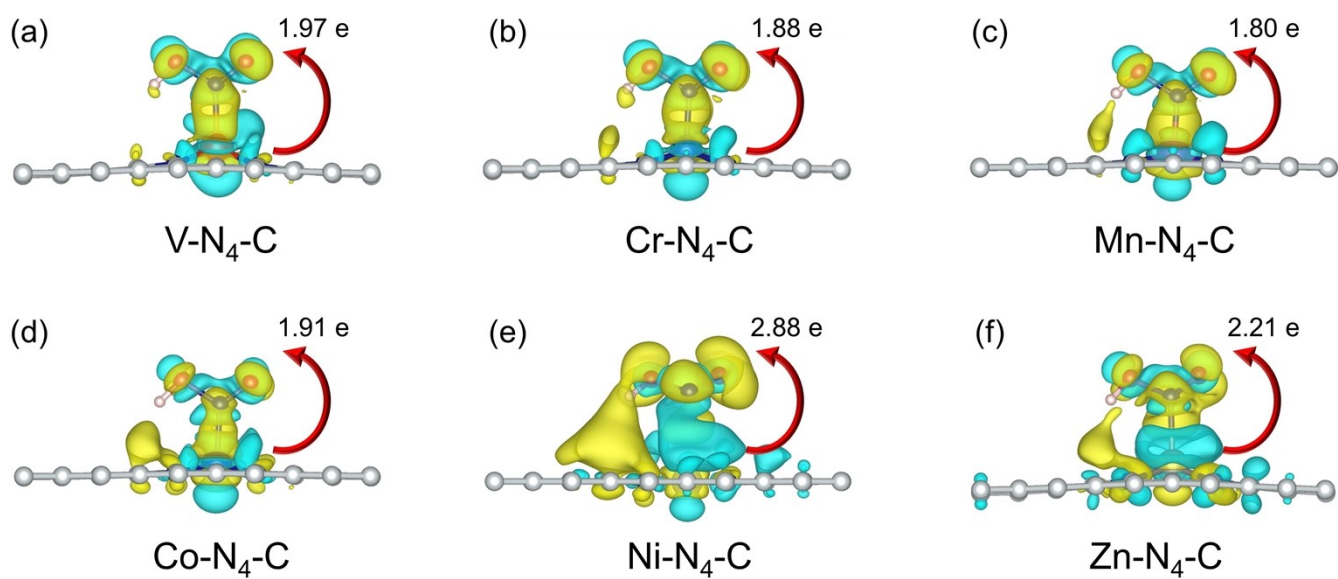

97

98 **Fig. S12** Electronic density difference between different SACs and HNO<sub>2</sub> Contour lines in the plots are drawn

99 at 0.001 e Å<sup>-3</sup> intervals.

100

101 **Table S2.** Charge transfer ( $Q$ ) of the central TM and the bond length ( $d$ ) between TM and  $\text{HNO}_2$  gas molecule  
102 on different SACs.

| Catalysts            | $Q(e)$ | $d(\text{\AA})$ |
|----------------------|--------|-----------------|
| V-N <sub>4</sub> -C  | -1.57  | 1.97            |
| Cr-N <sub>4</sub> -C | -1.42  | 1.88            |
| Mn-N <sub>4</sub> -C | -1.33  | 1.80            |
| Fe-N <sub>4</sub> -C | -1.12  | 1.77            |
| Co-N <sub>4</sub> -C | -1.04  | 1.91            |
| Ni-N <sub>4</sub> -C | -0.87  | 2.88            |
| Cu-N <sub>4</sub> -C | -0.95  | 2.95            |
| Zn-N <sub>4</sub> -C | -1.21  | 2.21            |

103
